# Supplementary material
Source: PubMed Central journal article supplement (PMC5771996)

## **Supplemental Material**

Supplemental Table 1: Tumor Mutational burden according to individual KRAS mutation.

| <b>KRAS subtype</b> | <b>N</b> | <b>Median Tumor Mutational Burden</b> | <b>Range</b> |
|---------------------|----------|---------------------------------------|--------------|
| G12A                | 24       | 8.5                                   | 0.9 – 35.9   |
| G12C                | 143      | 8.2                                   | 0.9 – 35.9   |
| G12D                | 52       | 5.7                                   | 0.9 – 17.4   |
| G12V                | 50       | 7.5                                   | 0.9 – 22.5   |
| Other               | 61       | 8.5                                   | 0.9 – 45.3   |

Supplemental Table 2: Multivariate Analysis of duration of platinum/pemetrexed chemotherapy in patients with *KRAS*-mutant NSCLC

| <b>Variable</b>                          | <b>HR (95% CI of HR)</b> | <b>p-Value</b> |
|------------------------------------------|--------------------------|----------------|
| <i>TP53</i> (+ vs -)                     | 1.01 (0.64 - 1.61)       | 0.9            |
| <i>STK11</i> (+ vs -)                    | 1.02 (0.64 - 1.61)       | 0.9            |
| <i>KEAP1/NFE2L2</i> (+/-)                | 1.64 (1.04 - 2.59)       | 0.03           |
| Bevacizumab use (yes vs. no)             | 0.66 (0.46 - 0.94)       | 0.02           |
| Gender (male vs female)                  | 1.23 (0.86 - 1.77)       | 0.25           |
| Age at diagnosis                         | 1.00 (0.98 - 1.02)       | 0.7            |
| Smoking Status (former/current vs never) | 1.30 (0.50 - 3.38)       | 0.5            |
| KPS at diagnosis (KPS 80-100 vs <80)     | 0.83 (0.55 - 1.25)       | 0.38           |

Supplemental Table 3: Multivariate Analysis of duration of immunotherapy in patients with *KRAS*-mutant NSCLC

| <b>Variable</b>                      | <b>HR (95% CI of HR)</b> | <b>p-Value</b> |
|--------------------------------------|--------------------------|----------------|
| <i>TP53</i> (+ vs -)                 | 1.18 (0.64 - 2.17)       | 0.6            |
| <i>STK11</i> (+ vs -)                | 1.40 (0.75 - 2.63)       | 0.3            |
| <i>KEAP1/NFE2L2</i> (+/-)            | 1.64 (0.89 - 3.00)       | 0.1            |
| Gender (male vs female)              | 1.22 (0.68 - 2.21)       | 0.5            |
| Age at diagnosis                     | 0.82 (0.99 - 1.06)       | 0.1            |
| Line of Therapy (3+ vs 1 or 2)       | 0.55 (0.24 - 1.26)       | 0.2            |
| KPS at diagnosis (KPS 80-100 vs <80) | 0.82 (0.41 - 1.63)       | 0.6            |

Supplemental Table 4: Multivariate Analysis of Overall Survival from start of Immunotherapy in patients with *KRAS*-mutant NSCLC

| Variable                             | HR (95% CI of HR)  | p-Value |
|--------------------------------------|--------------------|---------|
| <i>TP53</i> (+ vs -)                 | 1.95 (0.90 - 4.21) | 0.09    |
| <i>STK11</i> (+ vs -)                | 1.35 (0.61 - 2.96) | 0.46    |
| <i>KEAP1/NFE2L2</i> (+/-)            | 3.54 (1.55 - 8.11) | 0.003   |
| Tumor mutation Burden                | 0.90 (0.83 - 0.99) | 0.03    |
| Gender (male vs female)              | 1.75 (0.79 - 3.89) | 0.17    |
| Age at diagnosis                     | 1.05 (1.00 - 1.11) | 0.05    |
| Line of Therapy (3+ vs 1 or 2)       | 0.37 (0.12-1.18)   | 0.09    |
| KPS at diagnosis (KPS 80-100 vs <80) | 0.93 (0.36 – 2.43) | 0.89    |

Supplemental Figure 1: Duration of platinum/pemetrexed +/- bevacizumab therapy in subset of patients receiving first line therapy for Stage IV disease by *KEAP1/NFE2L2* mutations.

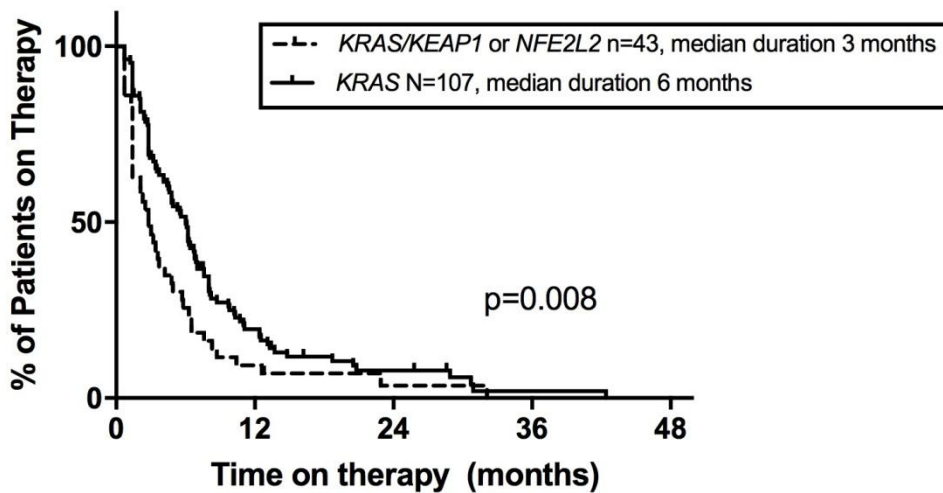

Supplemental Figure 2: Duration of immune checkpoint inhibitor for treatment of Stage IV disease by different co-occurring mutations (**A**, *STK11* **B**, *KEAP1* or *NFE2L2*, **C**, *TP53*)

**A**

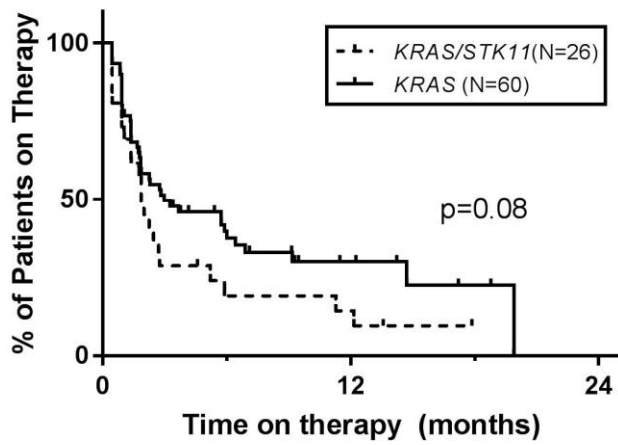

**B**

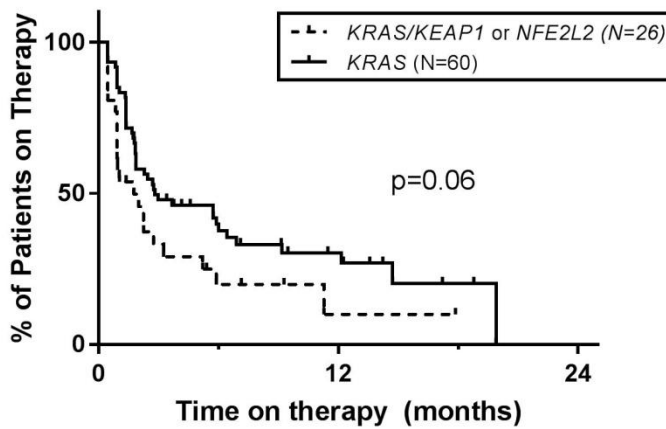

**C**

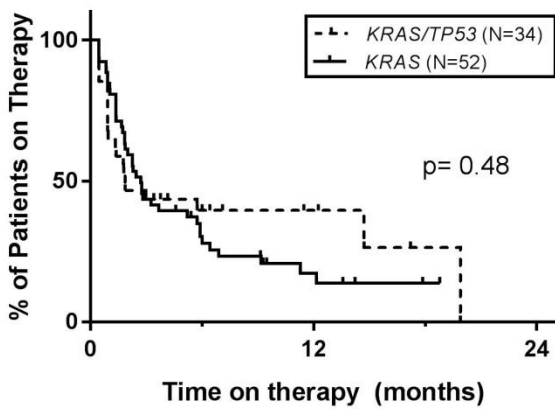

Supplement: NIHMS917304-supplement-1.pdf [file NIHMS917304-supplement-1.pdf]
